# Supplementary material
Source: publisher figshare collection journal article supplement (https://tandf.figshare.com/articles/dataset/_/21617500)
Supplement: Supplementary file 1 [file 1]

| Name | K <sub>p,uu,brain</sub> | WPSA    | dipole | # rotor | LogBB     |
|------|-------------------------|---------|--------|---------|-----------|
| T1   | 0.016                   | 0.038   | 9.419  | 9       | -1.013886 |
| T2   | 0.06                    | 0       | 6.25   | 8       | -0.773264 |
| T3   | 0.03                    | 71.858  | 8.887  | 5       | -0.911143 |
| T4   | 0.04                    | 46.927  | 6.345  | 6       | -0.492034 |
| T5   | 0.05                    | 0       | 5.565  | 6       | -0.834327 |
| T6   | 0.02                    | 46.94   | 5.8    | 8       | -0.344854 |
| T7   | 0.03                    | 63.196  | 9.028  | 10      | -1.090865 |
| T8   | 0.04                    | 0       | 7.148  | 7       | -1.072352 |
| T9   | 0.07                    | 0       | 7.981  | 9       | -0.871638 |
| T10  | 0.03                    | 118.033 | 7.423  | 5       | -0.538109 |
| T11  | 0.09                    | 59.166  | 8.705  | 9       | -1.083887 |
| T12  | 0.002                   | 0       | 4.455  | 6       | -0.8061   |
| T13  | 0.88                    | 73.47   | 9.316  | 4       | -0.718048 |
| T14  | 0.089                   | 0       | 5.747  | 10      | -0.725939 |
| T15  | 0.07                    | 69.781  | 10.105 | 4       | -0.715299 |
| T16  | 0.003                   | 0       | 8.063  | 10      | -1.080521 |
| T17  | 0.03                    | 46.53   | 6.528  | 6       | -0.856859 |
| T18  | 0.23                    | 1.389   | 8.429  | 5       | -0.741793 |
| T19  | 0.51                    | 84.611  | 5.737  | 7       | 0.7307558 |
| T20  | 0.53                    | 0       | 1.137  | 7       | 0.5870505 |
| T21  | 0.49                    | 84.436  | 5.765  | 7       | 0.7307558 |
| T22  | 0.08                    | 0       | 7.842  | 8       | -0.811487 |
| T23  | 0.04                    | 0       | 7.071  | 7       | -0.670062 |
| T24  | 0.03                    | 0       | 6.618  | 7       | -0.646629 |
| T25  | 0.59                    | 76.399  | 4.004  | 6       | 0.6931575 |
| T26  | 0.03                    | 29.499  | 9.349  | 7       | -0.835626 |
| T27  | 0.47                    | 0       | 5.015  | 8       | -0.915627 |
| T28  | 0.02                    | 0       | 6.229  | 6       | -0.998665 |
| T29  | 0.48                    | 81.865  | 3.465  | 8       | 0.7063728 |
| T30  | 0.36                    | 0       | 6.916  | 7       | -0.893715 |
| T31  | 0.04                    | 0       | 6.885  | 7       | -1.06947  |
| T32  | 0.2                     | 0       | 8.493  | 7       | -1.05798  |
| T33  | 0.24                    | 0       | 7.229  | 7       | -0.79986  |
| T34  | 0.02                    | 0       | 8.658  | 7       | -0.746935 |
| T35  | 0.34                    | 81.857  | 2.894  | 8       | 0.7063728 |
| T36  | 0.75                    | 61.155  | 3.731  | 7       | 0.7702505 |
| T37  | 0.003                   | 68.896  | 5.339  | 3       | -0.560273 |
| T38  | 0.42                    | 0       | 5.486  | 5       | -0.521796 |
