# Supplementary material
Source: publisher figshare collection journal article supplement (https://tandf.figshare.com/articles/dataset/_/21617500)
Supplement: Supplementary file 2 [file 1]

Supplementary Table1 Market drug compounds

| Name          | Structures                                                                                                           | K <sub>p,uu,brain</sub> | WPSA    | dipole | # rotor | LogBB      |
|---------------|----------------------------------------------------------------------------------------------------------------------|-------------------------|---------|--------|---------|------------|
| alprenolol    | 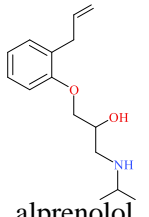<br>alprenolol                      | 0.38                    | 0       | 1.91   | 9       | 0.34760033 |
| amantadine    | <br>amantadine                      | 3                       | 0       | 1.214  | 1       | 0.39513311 |
| amitriptyline | <br>amitriptyline                   | 1.03                    | 0       | 0.913  | 3       | 0.59572605 |
| aripiprazole  | <br>aripiprazole                   | 1.64                    | 108.619 | 4.802  | 6       | 0.11766015 |
| atenolol      | <br>atenolol                      | 0.026                   | 0       | 4.842  | 9       | -0.7992473 |
| atomoxetine   | AND Enantiomer<br><br>atomoxetine | 2.13                    | 0       | 1.479  | 6       | 0.74835506 |
| baclofen      | <br>baclofen                      | 0.02                    | 71.498  | 5.876  | 5       | -0.7189156 |
| bupropion     | <br>bupropion                     | 4.535                   | 71.501  | 5.316  | 4       | 0.78605775 |
| carbamazepine | <br>carbamazepine                 | 0.76                    | 0       | 5.736  | 0       | -0.1812232 |

|                 |                                                                                                                  |       |         |       |   |            |
|-----------------|------------------------------------------------------------------------------------------------------------------|-------|---------|-------|---|------------|
| chlorpromazine  | 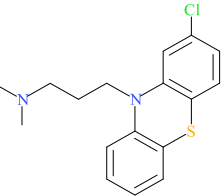<br>chlorpromazine              | 4.27  | 107.457 | 3.204 | 4 | 1.00990209 |
| citalopram      | <br>citalopram                  | 1.3   | 46.815  | 3.882 | 5 | 0.41956006 |
| clomipramine    | <br>clomipramine                | 2.77  | 69.46   | 2.875 | 4 | 1.0175532  |
| clozapine       | <br>clozapine                  | 4.26  | 71.631  | 5.308 | 0 | 1.01140987 |
| codeine         | AND Enantiomer<br><br>codeine | 0.89  | 0       | 3.741 | 2 | 0.29701676 |
| delavirdine     | <br>delavirdine               | 0.043 | 0       | 3.35  | 5 | -1.0515182 |
| diazepam        | <br>diazepam                  | 1.015 | 71.287  | 4.579 | 0 | 0.26791337 |
| diphenhydramine | <br>diphenhydramine           | 1.05  | 0       | 0.935 | 6 | 0.65291433 |
| donepezil       | <br>donepezil                 | 2.36  | 0       | 2.35  | 6 | 0.44779015 |

|                          |                                                                                                               |      |         |       |   |            |
|--------------------------|---------------------------------------------------------------------------------------------------------------|------|---------|-------|---|------------|
| doxepin                  | 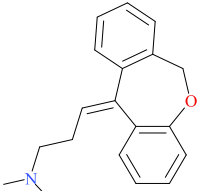<br>doxepin                  | 3.11 | 0       | 2.223 | 3 | 0.61422799 |
| ethosuximide             | <br>ethosuximide             | 1.5  | 0       | 2.482 | 1 | -0.0702309 |
| ethyl-2-phenylmalonamide | <br>ethyl-2-phenylmalonamide | 1.25 | 0       | 9.297 | 4 | -0.5117463 |
| fluoxetine               | <br>fluoxetine               | 5.23 | 117.519 | 3.658 | 6 | 1.00327459 |
| fluphenazine             | <br>fluphenazine           | 1.58 | 150.359 | 4.997 | 7 | 0.85964035 |
| gabapentin               | <br>gabapentin             | 0.14 | 0       | 6.829 | 4 | -0.7197993 |
| galantamine              | <br>galantamine            | 1.16 | 0       | 2.39  | 2 | 0.2868085  |
| haloperidol              | <br>haloperidol            | 2.09 | 118.337 | 3.744 | 6 | 0.66582063 |
| imipramine               | <br>imipramine             | 3.42 | 0       | 1.635 | 4 | 0.83201458 |
| indomethacin             | <br>indomethacin           | 0.11 | 71.504  | 3.516 | 4 | -1.0500256 |

|               |                                                                                                                                    |       |         |        |    |            |
|---------------|------------------------------------------------------------------------------------------------------------------------------------|-------|---------|--------|----|------------|
| isocarboxazid | 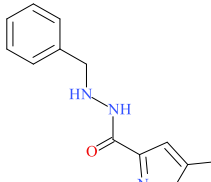<br>isocarboxazid                                 | 0.18  | 0       | 9.11   | 4  | -0.53929   |
| lamotrigine   | <br>lamotrigine                                   | 2.47  | 111.544 | 5.344  | 3  | -0.1783553 |
| levofloxacin  | <small>AND Enantiomer</small><br><br>levofloxacin | 0.12  | 26.549  | 13.051 | 1  | -0.5586958 |
| loperamide    | <br>loperamide                                   | 0.007 | 71.534  | 6.368  | 7  | 0.03208363 |
| loxapine      | <br>loxapine                                    | 2.95  | 71.33   | 0.911  | 0  | 0.9298662  |
| m3g           | <small>AND Enantiomer</small><br><br>m3g        | 0.011 | 0       | 10.781 | 7  | -1.3422003 |
| m6g           | <small>AND Enantiomer</small><br><br>m6g        | 0.008 | 0       | 4.449  | 14 | -1.1482171 |
| maprotiline   | <br>maprotiline                                 | 0.98  | 0       | 1.471  | 4  | 0.63921931 |
| memantine     | <br>memantine                                   | 6.06  | 0       | 1.194  | 1  | 0.6676614  |
| meprobamate   | <br>meprobamate                                 | 0.77  | 0       | 6.241  | 6  | -0.6217643 |

|                |                                                                                                     |       |        |        |    |            |
|----------------|-----------------------------------------------------------------------------------------------------|-------|--------|--------|----|------------|
| mesoridazine   | 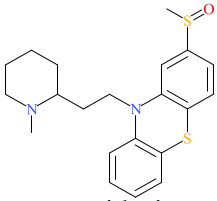<br>mesoridazine   | 0.1   | 59.306 | 8.03   | 4  | 0.29048901 |
| methotrexate   | <br>methotrexate   | 0.006 | 0      | 17.739 | 11 | -1.7772972 |
| metoclopramide | <br>metoclopramide | 0.4   | 66.514 | 4.991  | 8  | 0.16993975 |
| metoprolol     | <br>metoprolol    | 0.64  | 0      | 1.356  | 10 | 0.21232817 |
| mianserin      | <br>mianserin    | 3.15  | 0      | 1.152  | 0  | 0.59744578 |
| midazolam      | <br>midazolam    | 1.08  | 106.25 | 4.774  | 0  | 0.183787   |
| mirtazapine    | <br>mirtazapine  | 3.83  | 0      | 2.236  | 0  | 0.42853391 |
| morphine       | <br>morphine     | 0.21  | 0      | 4.249  | 2  | 0.06117434 |
| nadolol        | <br>nadolol      | 0.037 | 0      | 4.144  | 9  | -0.5066006 |

|                |                                                                                                                                               |       |        |        |    |            |
|----------------|-----------------------------------------------------------------------------------------------------------------------------------------------|-------|--------|--------|----|------------|
| nelfinavir     | <div><div>AND Enantiomer</div>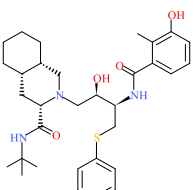<div>nelfinavir</div></div>    | 0.019 | 21.525 | 8.952  | 12 | -0.2654292 |
| nitrofurantoin | <div><div>nitrofurantoin</div></div>                         | 0.011 | 0      | 4.491  | 4  | -0.742793  |
| norfloxacin    | <div><div>norfloxacin</div></div>                            | 0.028 | 31.195 | 13.351 | 2  | -0.4740454 |
| nortriptyline  | <div><div>nortriptyline</div></div>                         | 1.65  | 0      | 1.556  | 3  | 0.53894907 |
| olanzapine     | <div><div>olanzapine</div></div>                           | 2.14  | 44.776 | 5.724  | 0  | 0.86978876 |
| oxprenolol     | <div><div>oxprenolol</div></div>                           | 0.2   | 0      | 2.455  | 10 | 0.34821367 |
| oxycodone      | <div><div>AND Enantiomer</div><div>oxycodone</div></div>   | 1.03  | 0      | 5.224  | 2  | 0.10833084 |
| oxymorphone    | <div><div>AND Enantiomer</div><div>oxymorphone</div></div> | 0.79  | 0      | 5.745  | 2  | -0.012727  |
| paclitaxel     | <div><div>AND Enantiomer</div><div>paclitaxel</div></div>  | 0.007 | 0      | 12.163 | 13 | -1.2512715 |

|              |                                                                                                                                    |       |         |       |    |            |
|--------------|------------------------------------------------------------------------------------------------------------------------------------|-------|---------|-------|----|------------|
| pemoline     | 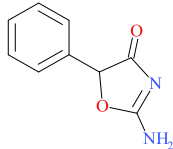<br>pemoline                                      | 0.55  | 0       | 8.077 | 1  | -0.6122243 |
| perphenazine | <br>perphenazine                                  | 7.12  | 106.383 | 3.544 | 7  | 0.54538535 |
| phenelzine   | <br>phenelzine                                    | 1.48  | 0       | 2.906 | 4  | 0.04047784 |
| phenytoin    | <br>phenytoin                                    | 0.66  | 0       | 3.934 | 0  | -0.0565406 |
| pindolol     | <br>pindolol                                    | 0.5   | 0       | 3.601 | 7  | -0.238271  |
| primidone    | <br>primidone                                   | 0.38  | 0       | 5.953 | 1  | -0.0838313 |
| propranolol  | <br>propranolol                                 | 0.61  | 0       | 2.028 | 7  | 0.57460664 |
| quetiapine   | <br>quetiapine                                  | 1.38  | 27.449  | 3.017 | 6  | 0.0956801  |
| rifampicin   | <small>AND Enantiomer</small><br><br>rifampicin | 0.035 | 0       | 5.211 | 24 | -0.7039848 |

|                |                                                                                                                                    |       |         |       |    |            |
|----------------|------------------------------------------------------------------------------------------------------------------------------------|-------|---------|-------|----|------------|
| risperidone    | 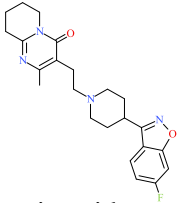<br>risperidone                                   | 0.21  | 46.707  | 8.399 | 3  | -0.2785065 |
| ritanserin     | <br>ritanserin                                    | 0.33  | 148.335 | 4.139 | 5  | 0.56380695 |
| rizatriptan    | <br>rizatriptan                                   | 0.04  | 0       | 5.327 | 5  | -0.5073632 |
| salicylic acid | <br>salicylic acid                               | 0.19  | 0       | 7.816 | 2  | -0.3794421 |
| saquinavir     | <small>AND Enantiomer</small><br><br>saquinavir | 0.055 | 0       | 2.82  | 14 | -0.8698122 |
| selegiline     | <small>AND Enantiomer</small><br><br>selegiline | 1.08  | 0       | 0.927 | 5  | 0.30193082 |
| sertraline     | <small>AND Enantiomer</small><br><br>sertraline | 2.67  | 129.894 | 4.867 | 1  | 0.93678274 |
| sumatriptan    | <br>sumatriptan                                 | 0.04  | 0       | 8.277 | 6  | -0.8489241 |
| tacrine        | <br>tacrine                                     | 1.195 | 0       | 4.225 | 1  | 0.16689372 |
| temazepam      | <br>temazepam                                   | 0.8   | 71.315  | 3.974 | 1  | 0.146207   |



|                 |                                                                                                        |      |         |       |   |            |
|-----------------|--------------------------------------------------------------------------------------------------------|------|---------|-------|---|------------|
| thiopental      | 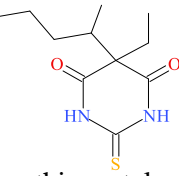<br>thiopental        | 1.53 | 80.691  | 2.219 | 4 | -0.1001955 |
| thioridazine    | <br>thioridazine      | 1.64 | 78.035  | 4.258 | 4 | 0.93619327 |
| thiothixene     | <br>thiothixene       | 0.13 | 37.255  | 6.16  | 6 | 0.14248027 |
| tiagabine       | <br>tiagabine        | 0.62 | 46.703  | 7.694 | 6 | -0.6151577 |
| topimarate      | <br>topimarate      | 0.33 | 1.407   | 2.92  | 4 | -1.4149217 |
| tramadol        | <br>tramadol        | 1.46 | 0       | 0.858 | 4 | 0.45758082 |
| trazodone       | <br>trazodone       | 1.49 | 71.543  | 3.82  | 4 | 0.43306715 |
| trifluoperazine | <br>trifluoperazine | 3.34 | 147.568 | 3.617 | 4 | 1.21205563 |
| venlafaxine     | <br>venlafaxine     | 1.91 | 0       | 2.302 | 6 | 0.44549143 |

|            |                                                                                                                                 |       |        |       |    |            |
|------------|---------------------------------------------------------------------------------------------------------------------------------|-------|--------|-------|----|------------|
| verapamil  | <div>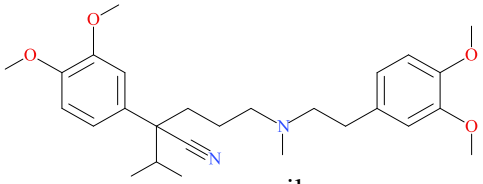<br/>verapamil</div>                      | 0.053 | 0      | 6.054 | 14 | -0.353849  |
| zaleplon   | <div><br/>zaleplon</div>                       | 0.59  | 0      | 6.449 | 4  | -1.0751168 |
| zidovudine | <div>AND Enantiomer<br/><br/>zidovudine</div>  | 0.09  | 0      | 4.64  | 3  | -1.0788293 |
| moxalactam | <div>AND Enantiomer<br/><br/>moxalactam</div> | 0.019 | 33.924 | 10.5  | 10 | -1.7377688 |
